# Supplementary material for: Cultivar-specific transcriptome and pan-transcriptome reconstruction of tetraploid potato
Source: PubMed Central journal article supplement (PMC7382494; doi:10.1038/s41597-020-00581-4), 2020-07-24

## Supplementary Information

### Supplementary Figures

**Supplementary Figure 1. Contribution of individual *de novo* assemblies to cultivar Désirée transcriptome.** Proportion of all contigs in de novo assembly (blue bars) and proportion of EvidentialGene okay set (green bars), and the number of complete BUSCOs (dots) using embryophyta\_odb9 set are shown. Assembly software abbreviations: CLCdn - CLC Genomics Workbench, Vdn - Velvet. <http://doi.org/10.15490/FAIRDOMHUB.1.DATAFILE.3107.1>

**Supplementary Figure 2. Contribution of individual *de novo* assemblies to cultivar PW363 transcriptome.** Proportion of all contigs in de novo assembly (blue bars) and proportion of EvidentialGene okay set (green bars), and the number of complete BUSCOs (dots) using embryophyta\_odb9 set are shown. Assembly software abbreviations: CLCdn - CLC Genomics Workbench, Vdn - Velvet, Sdn - SPAdes. <http://doi.org/10.15490/FAIRDOMHUB.1.DATAFILE.3108.1>

**Supplementary Figure 3. Contribution of individual *de novo* assemblies to cultivar Rywal transcriptome.** Proportion of all contigs in de novo assembly (blue bars) and proportion of EvidentialGene okay set (green bars), and the number of complete BUSCOs (dots) using embryophyta\_odb9 set are shown. Assembly software abbreviations: CLCdn - CLC Genomics Workbench, Vdn - Velvet, Sdn - SPAdes, PBdn - PacBio. <http://doi.org/10.15490/FAIRDOMHUB.1.DATAFILE.3109.1>

**Supplementary Figure 4. Venn diagrams showing the overlap of paralogue clusters in cultivar-specific transcriptomes and merged Phureja DM gene models.** Representatives and alternatives of the stPanTr (pan-transcriptome) paralogue cluster are counted as well as alternatives defined at stCuSTr (cultivar-specific transcriptome) step. For Phureja, the merged ITAG and PGSC DM gene models were counted. <http://doi.org/10.15490/FAIRDOMHUB.1.DATAFILE.3409.2>

Supplementary Figure 1.

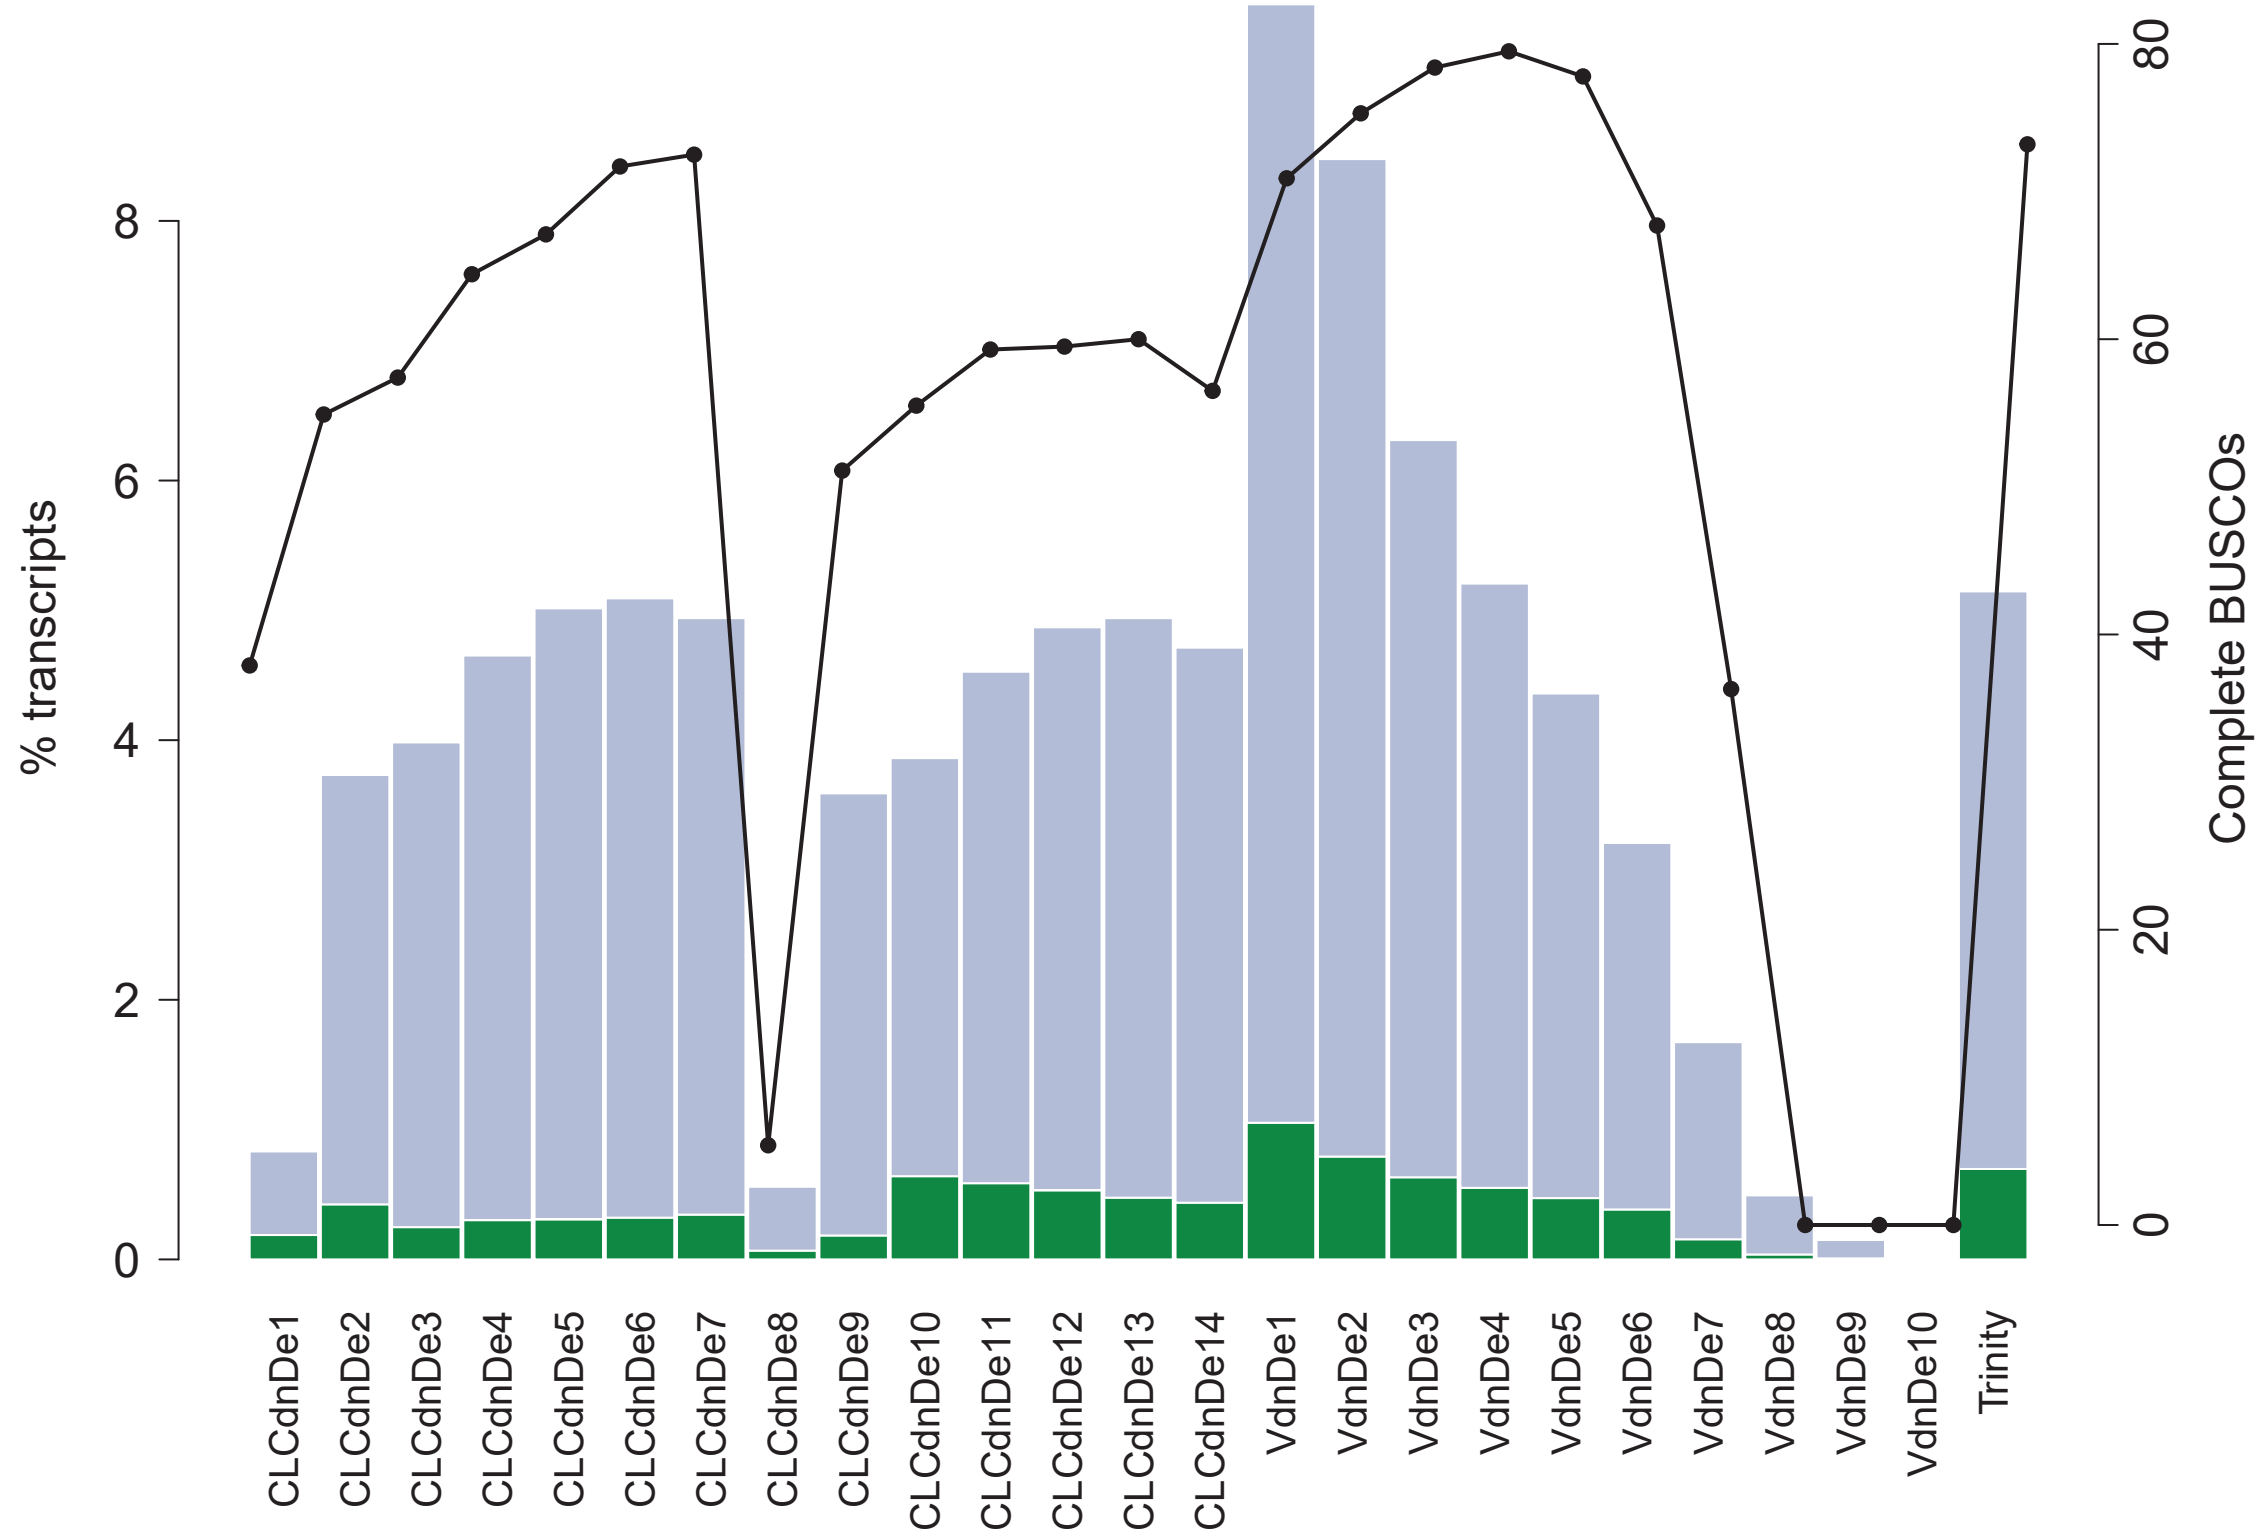

Supplementary Figure 2.

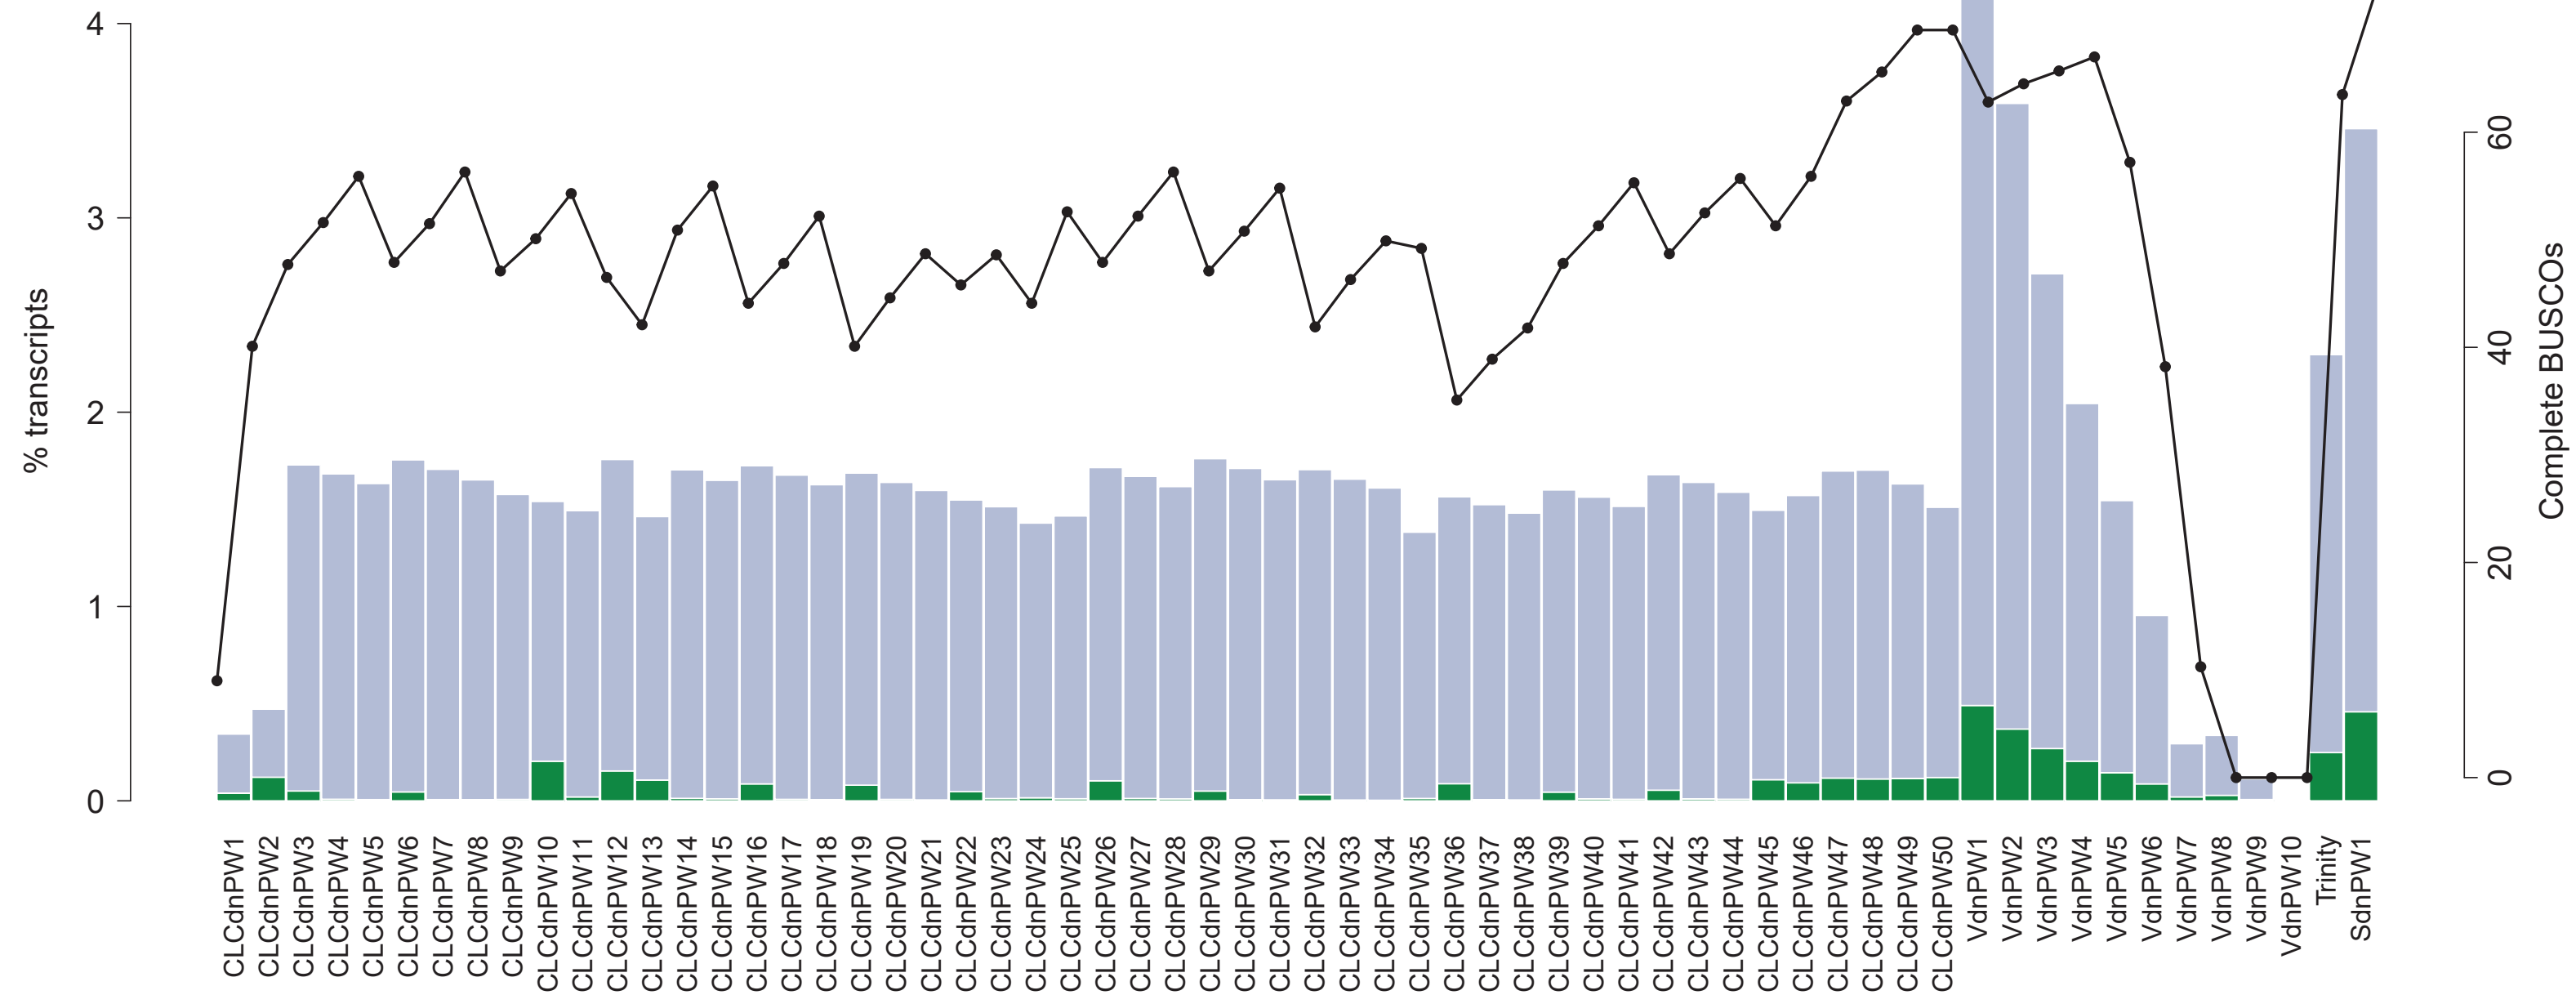

Supplementary Figure 3.

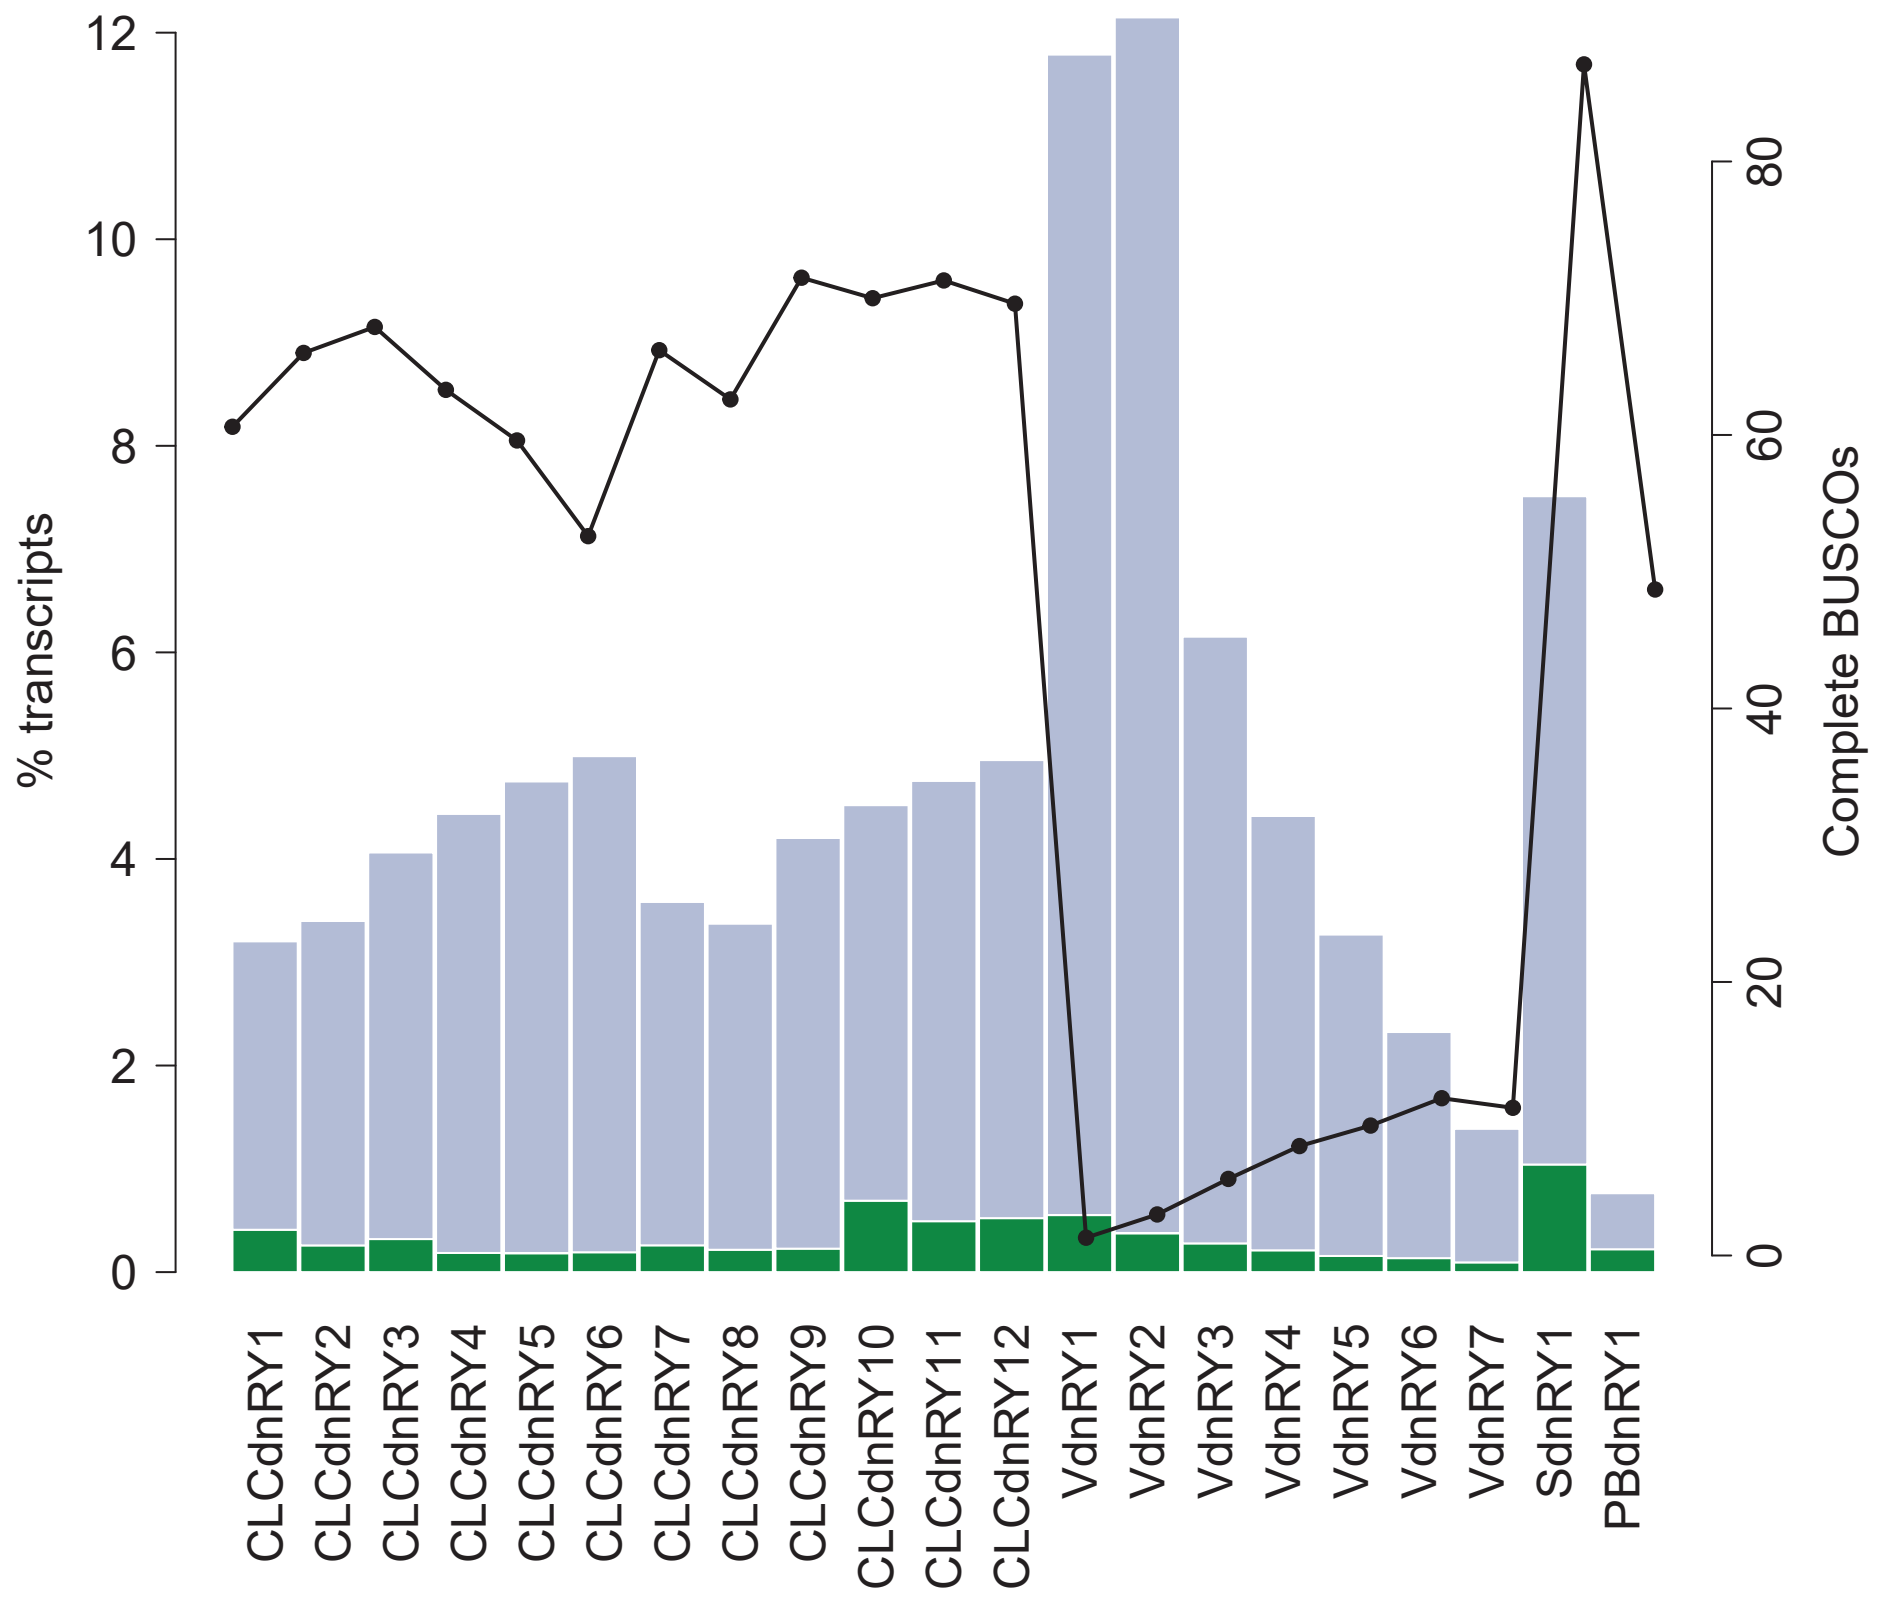

Supplementary Figure 4.

stPanTr clusters: representatives

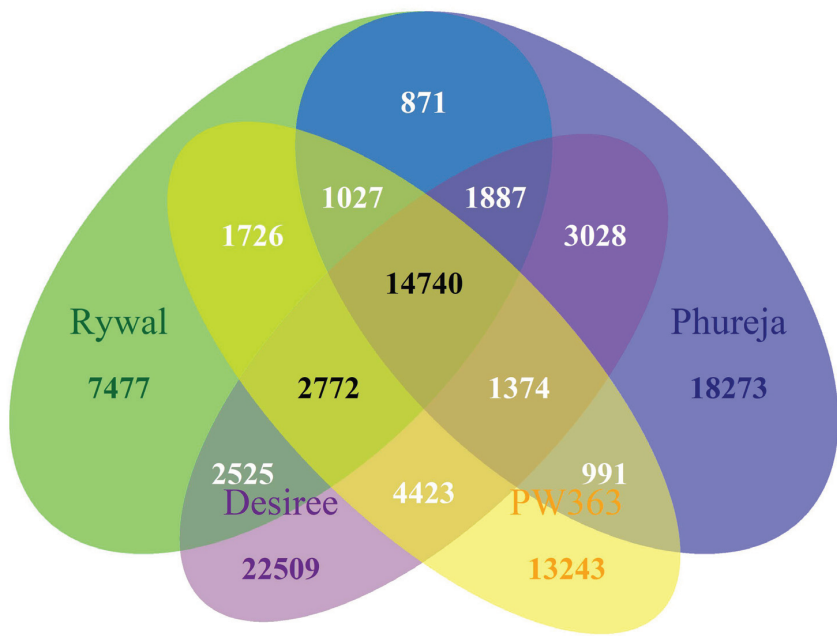

stPanTr clusters: representatives

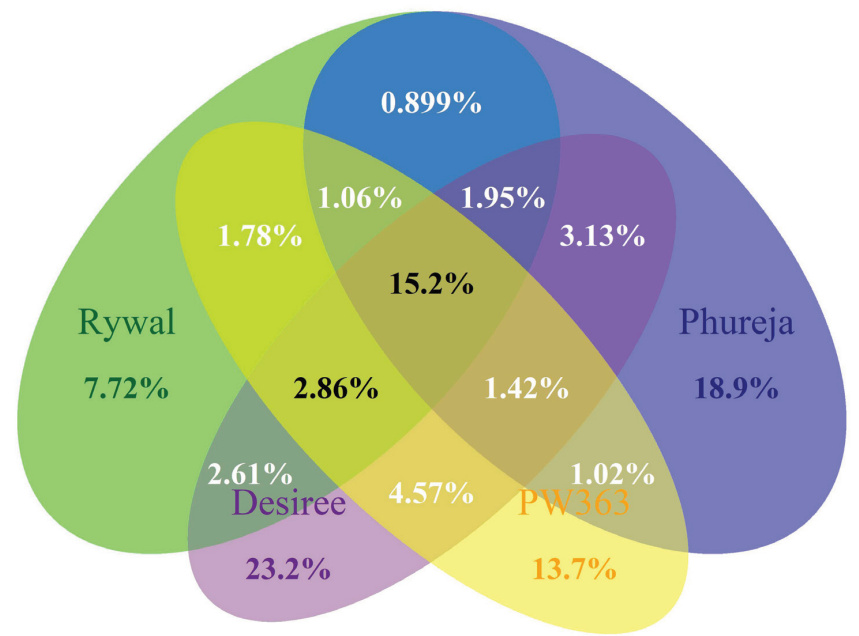

stPanTr clusters

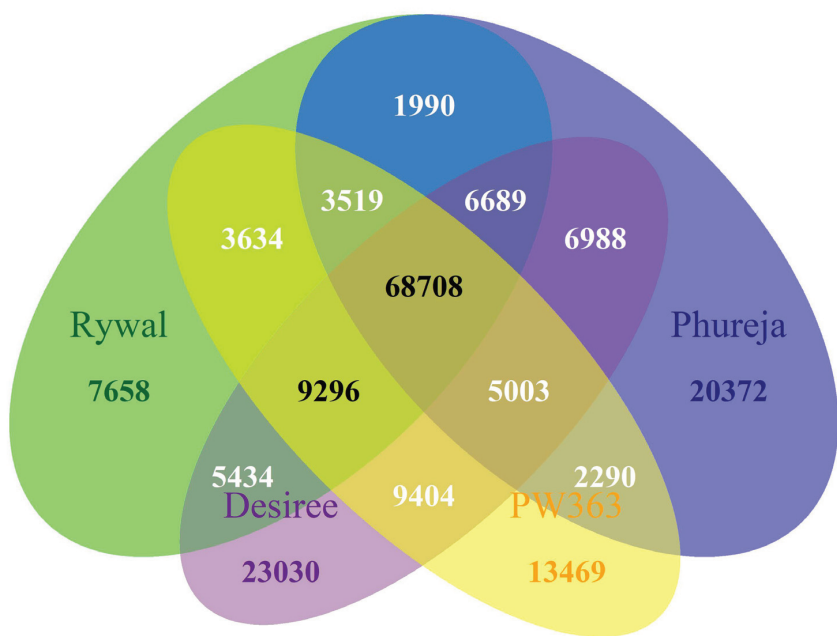

stPanTr clusters

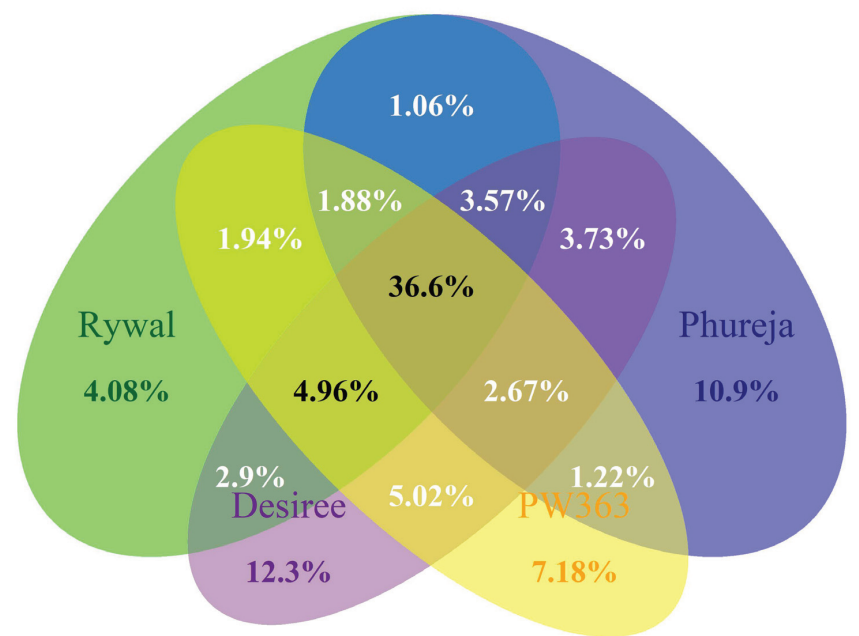

stPanTr clusters including stCuSTr alternatives

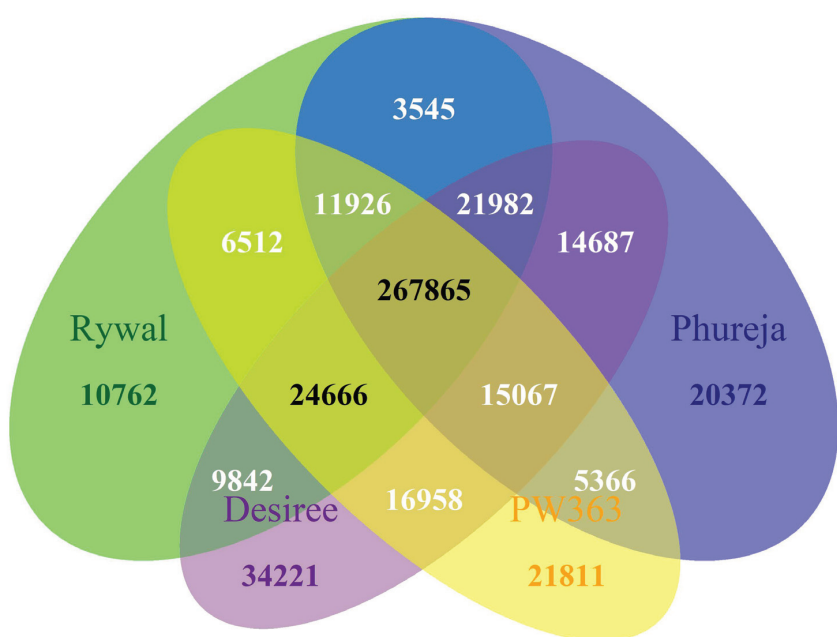

stPanTr clusters including stCuSTr alternatives

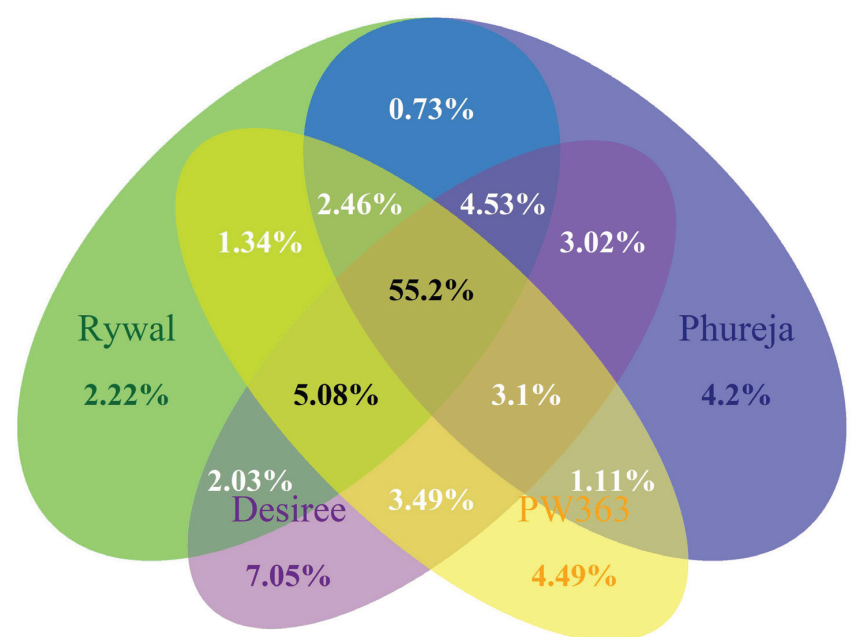

Supplement: 41597_2020_581_MOESM1_ESM.pdf [file 41597_2020_581_MOESM1_ESM.pdf]
